# Supplementary material for: Tissue engineering of human hair follicles using a biomimetic developmental approach
Source: PubMed Central journal article supplement (PMC6294003; doi:10.1038/s41467-018-07579-y), 2018-12-13
Supplement: 41467_2018_7579_MOESM1_ESM.pdf [file 41467_2018_7579_MOESM1_ESM.pdf]

## **Supplementary Information**

### **Tissue engineering of human hair follicles using a biomimetic developmental approach**

Abaci et. al.

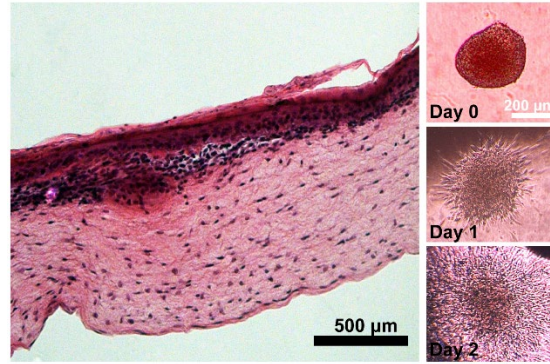

**Supplementary Figure 1. Regression of DPC spheroids in HSCs.** DPC spheroids were produced by the hanging drop method and embedded in HSCs where they gradually regressed and dispersed into the dermal compartment in several days. Scale bars: 500 µm (left panel) 200 µm (right panel)

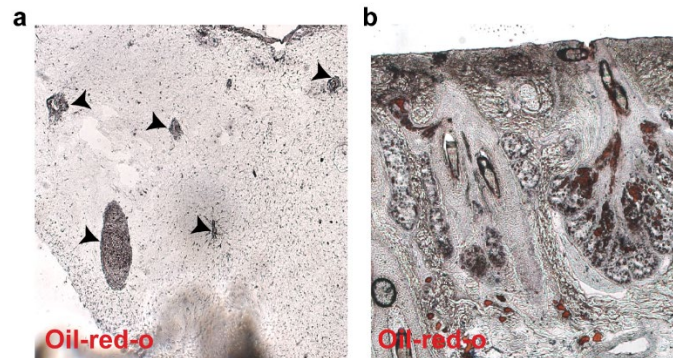

**Supplementary Figure 2. Sebocyte differentiation is not induced in HSCs.** Histological sections of HSCs (arrowheads indicate HF) (a) and human scalp tissue (b) stained with Oil-red-O.

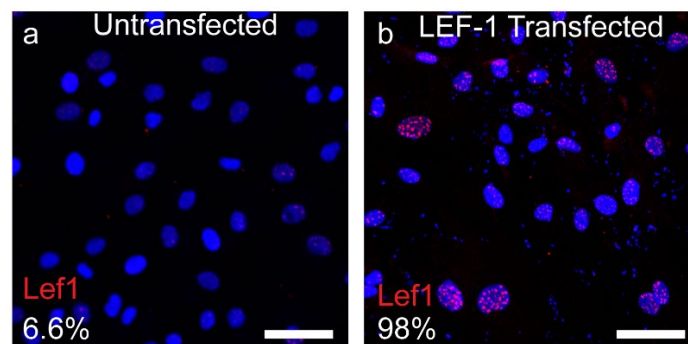

**Supplementary Figure 3. Transfection efficiency of Lef-1.** Untransfected (a) and Lef-1 transfected (b) DPCs in 2D culture stained with Lef-1 antibody (red) and DAPI (blue). Scale bars: 10 µm

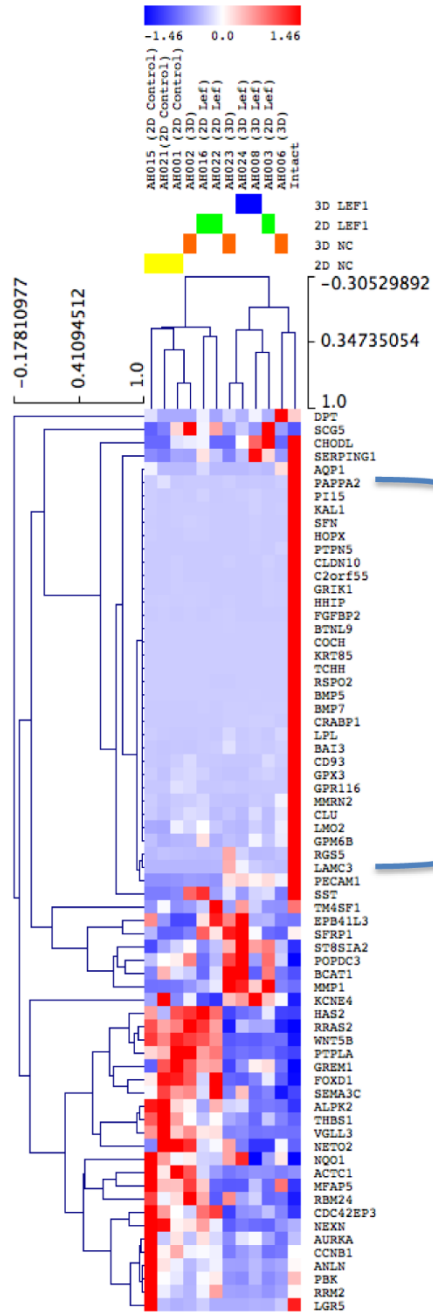

Set of genes that are required to completely reprogram intact DPC gene signature

**Supplementary Figure 4. Heatmap and hierarchical clustering analyses of RNA-sequencing data of DPCs cultured in different conditions. 3D spheroid culture and Lef-1 overexpression both significantly restored intact DPC gene signature.**

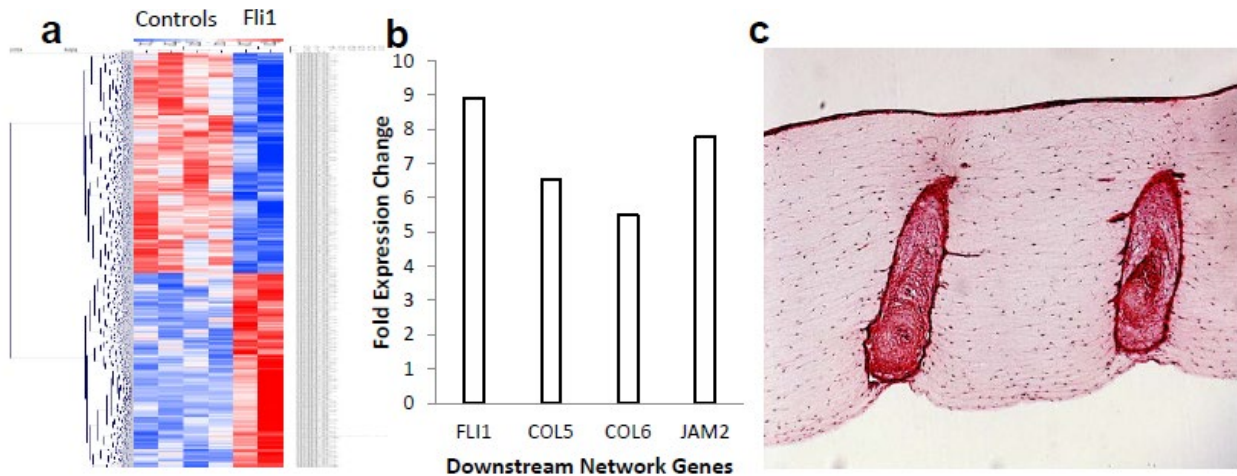

**Supplementary Figure 5. Reprogramming of DPCs by Fli-1 overexpression.** (a) Heat map of DPCs illustrating gene expression profiles of cultured DPCs (passage 3) from three different donors, empty-vector transfected control, and Fli1 overexpressed DPCs from 2 donors. (b) RT-PCR of Fli-1 overexpressed cells showed upregulation of Fli-1 downstream network genes as predicted previously by ARACNE algorithm. (c) H&E staining of HSCs containing DPCs overexpressing Fli-1.

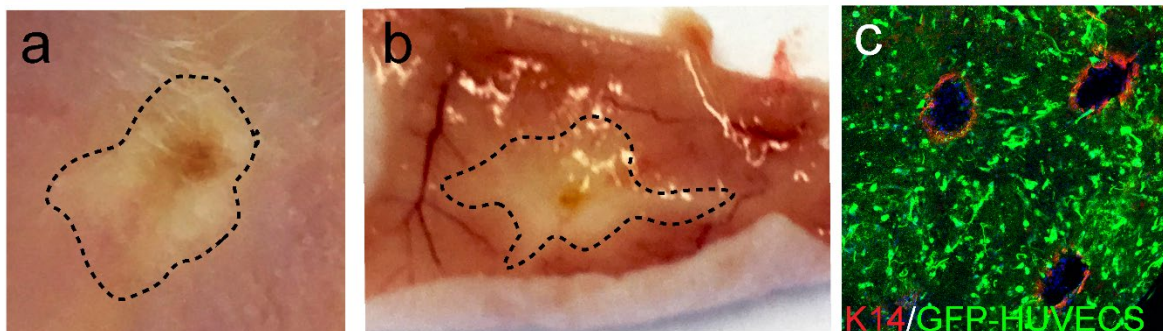

**Supplementary Figure 6. Necrosis in unvascularized hair-follicle-bearing grafts.** (a) Top view of the grafted HSCs showing necrotic tissue at the center of the grafts. (b) Bottom view of the explanted HSCs (dashed circle) after 4 weeks showing the absence of blood vessels. (c) Encapsulated GFP-HUVECs are in close proximity to the K14-labeled hair follicles in HSCs.

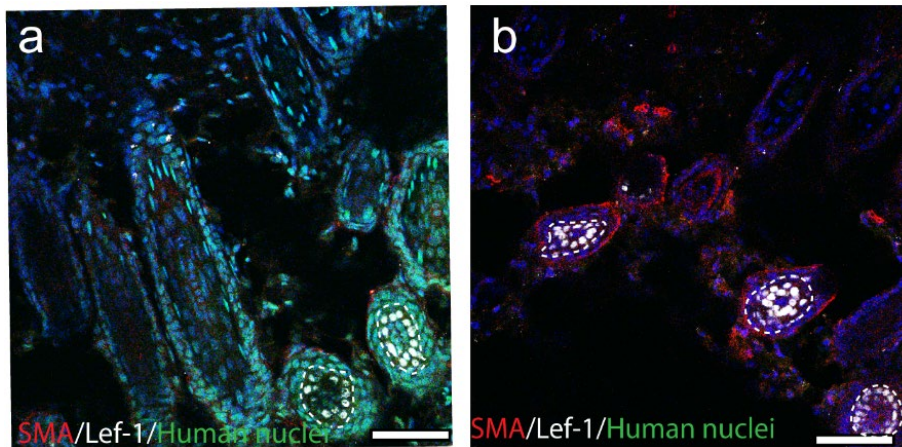

**Supplementary Figure 7. Dermal sheath cells are not present in engineered HFs.** SMA $\alpha$  expression is absent in the engineered human HFs (a), whereas mouse hair follicles express SMA $\alpha$  around the Lef-1-positive DPCs (b) (dashed circle indicates the DP compartment). Scale bars are 100  $\mu$ m

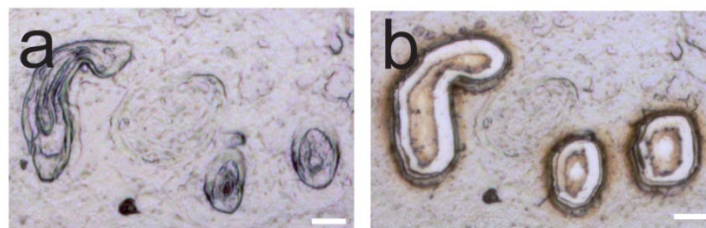

**Supplementary Figure 8. Laser-capture of engineered hair follicles.** Hair follicles in histological sections (a) were microdissected using laser capture (b).

**Supplementary Table 1.**

| <b>Primer</b>           | <b>Forward Sequence</b>      | <b>Reverse Sequence</b> |
|-------------------------|------------------------------|-------------------------|
| K16                     | GACCGGCGGAGATGTGAAC          | CTGCTCGTACTGGTCACGC     |
| K17                     | GGTGGGTGGTGAGATCAATGT        | CGGCATCCTTGC GGTTCTT    |
| K25                     | ATGTCTCTTCGACTTTCCAGTGC      | GCCACTTCCAATCCCTGAAAT   |
| K75                     | CCCAGGTCGGTGACACATC          | GCAATGTCCTCGTATTGTGCTTT |
| K71                     | GCTGCTTACGCCAATAAGGTG        | ATCTGAGTGATCTCGGCTTCA   |
| Wnt10a                  | GGAGACTCGCAACAAGATCCC        | CGATGGCGTAGGCCAAAAGC    |
| Wnt10b                  | CATCCAGGCACGAATGCGA          | CGGTTGTGGGTATCAATGAAGA  |
| Lef-1                   | AGAACACCCCGATGACGGA          | GGCATCATTATGTACCCGGAAT  |
| Human specific primer 1 | TATTGCAGCCCTAGCAGCACTCCA     | AGAATGAGGAGGTCTGCGGC    |
| Mouse specific primer 1 | GCACTGAAAATGCTTAGATGGATAATTG | CCTCTCATAAACGGATGTCTAG  |
| Human specific primer 2 | TAGACATCGTACTACACGACACG      | TCCAGGTTTATGGAGGGTTC    |
| Mouse specific primer 2 | ATTACAGCCGTACGCTCCTAT        | CCCAAAGAATCAGAACAGATGC  |

**Supplementary Table 2**

| <b>Antibody</b>     | <b>Company</b> | <b>Dilution</b> | <b>Catalog Number</b> |
|---------------------|----------------|-----------------|-----------------------|
| Keratin 14          | Covance        | 1:800           | 905301                |
| Keratin 5           | Covance        | 1:800           | PRB-160P              |
| Keratin 71          | Covance        | 1:100           | NBP2-14176            |
| Keratin 75          | Covance        | 1:100           | NBP1-87845            |
| AE13                | Santa Cruz     | 1:100           | sc-57012              |
| AE15                | Santa Cruz     | 1:100           | sc-80607              |
| Smooth muscle actin | Abcam          | 1:100           | ab5694                |
| CD133               | Abcam          | 1:100           | ab19898               |
| Versican            | Fisher Sci.    | 1:200           | PA1-1748A             |
| Ki67                | Abcam          | 1:800           | ab15580               |
| Human nucleus       | Millipore      | 1:100           | MAB1281B              |
| Lef-1               | Santa Cruz     | 1:100           | sc-8591               |
